# Supplementary material
Source: HighWire-hosted journal article supplement (https://jnm.snmjournals.org/highwire/filestream/95379/field_highwire_adjunct_files/0/209288_Supplemental_Data.pdf)
Supplement: 209288_Supplemental_Data.pdf [file 209288_Supplemental_Data.pdf]

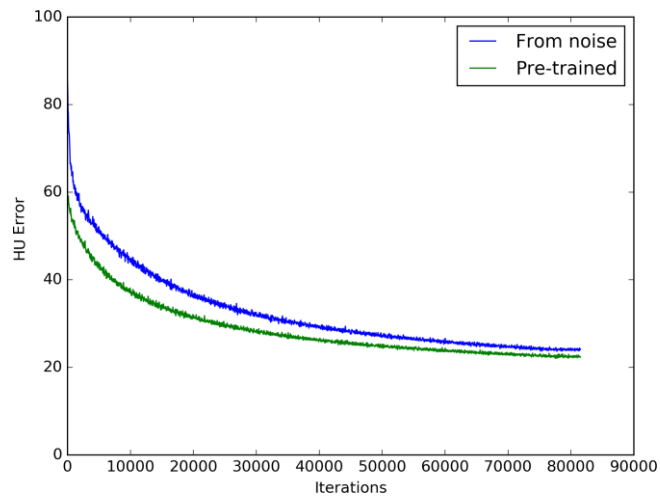

**Supplemental Figure 1.** Training error as a function of the number of iterations of the pretrained model compared to training from a noise distribution. Hounsfield Units (HU) error was computed as the L1-norm between the ground truth CT and the output pseudo-CT in each iteration.

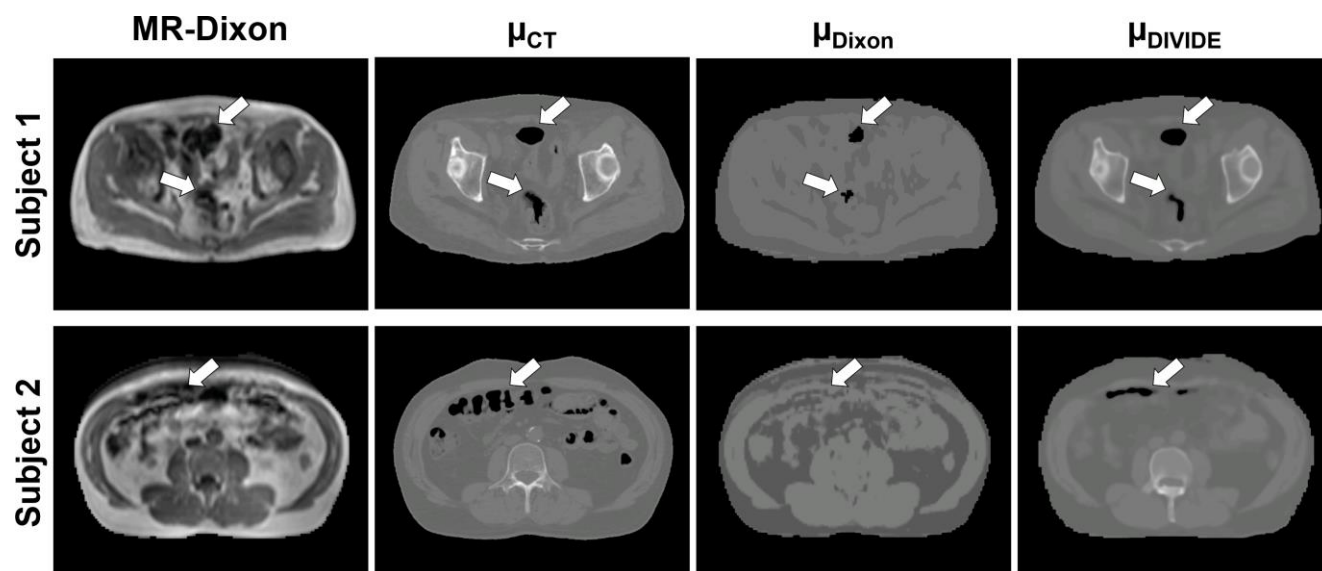

**Supplemental Figure 2.** Comparison of original MR and corresponding CT- and MR-based attenuation maps for a subject without (subject 1) and with (subject 2) air pockets displacement between acquisitions. Subject 1 shows a good agreement between air pockets observed in the  $\mu_{CT}$  and  $\mu_{DIVIDE}$ , while  $\mu_{Dixon}$  fails to capture the whole extent of the air pockets. Subject 2 shows an acceptable agreement between air pockets observed in the original MR and  $\mu_{DIVIDE}$ , while more and fewer air pockets were observed in the  $\mu_{CT}$  and  $\mu_{Dixon}$ , respectively.

| ID      | Disease    | Age         | Gender | Weight      | BMI        | Radiotracer             | Injected Dose (MBq) |
|---------|------------|-------------|--------|-------------|------------|-------------------------|---------------------|
| 01      | RCa        | 80          | M      | 80          | 23.39      | <sup>18</sup> F-FDG     | 286                 |
| 02_01   | RCa        | 67          | M      | 82          | 24.55      | <sup>18</sup> F-FDG     | 425                 |
| 02_02   |            | 68          |        | 55          | 16.47      | <sup>18</sup> F-FDG     | 419                 |
| 02_03   |            | 68          |        | 82          | 24.55      | <sup>18</sup> F-FDG     | 425                 |
| 03      | PCa        | 71          | M      | 78          | 23.35      | <sup>18</sup> F-FDG     | 259                 |
| 04      | PCa        | 77          | M      | 64          | 19.16      | <sup>18</sup> F-FDG     | 412                 |
| 05_01   | RCa        | 44          | F      | 69          | 21.17      | <sup>18</sup> F-FDG     | 413                 |
| 05_02   |            | 44          |        | 69          | 21.17      | <sup>18</sup> F-FDG     | 415                 |
| 06_01   | RCa        | 66          | F      | 53          | 17.43      | <sup>18</sup> F-FDG     | 339                 |
| 06_02   |            | 66          |        | 53          | 17.43      | <sup>18</sup> F-FDG     | 311                 |
| 07      | PCa        | 62          | M      | 92          | 24.21      | <sup>18</sup> F-Choline | 273                 |
| 08_01   | RCa        | 57          | F      | 75          | 24.35      | <sup>18</sup> F-FDG     | 389                 |
| 08_02   |            | 58          |        | 80          | 25.97      | <sup>18</sup> F-FDG     | 418                 |
| 08_03   |            | 58          |        | 70          | 22.73      | <sup>18</sup> F-FDG     | 416                 |
| 09      | PCa        | 67          | M      | 73          | 21.10      | <sup>18</sup> F-Choline | 348                 |
| 10_01   | RCa        | 54          | F      | 80          | 24.24      | <sup>18</sup> F-FDG     | 421                 |
| 10_02   |            | 55          |        | 62          | 18.79      | <sup>18</sup> F-FDG     | 383                 |
| 10_03   |            | 56          |        | 58          | 17.58      | <sup>18</sup> F-FDG     | 404                 |
| 11      | PCa        | 70          | M      | 78          | 23.21      | <sup>18</sup> F-FDG     | 187                 |
| 12_01   | RCa        | 46          | M      | 82          | 23.30      | <sup>18</sup> F-FDG     | 413                 |
| 12_02   |            | 46          |        | 82          | 23.30      | <sup>18</sup> F-FDG     | 404                 |
| 13      | RCa        | 52          | M      | 110         | 29.73      | <sup>18</sup> F-FDG     | 423                 |
| 14      | RCa        | 48          | M      | 80          | 22.22      | <sup>18</sup> F-FDG     | 410                 |
| 15      | RCa        | 66          | F      | 61          | 20.33      | <sup>18</sup> F-FDG     | 387                 |
| 16      | PCa        | 59          | M      | 75          | 21.80      | <sup>18</sup> F-Choline | 252                 |
| 17      | RCa        | 74          | F      | 55          | 18.33      | <sup>18</sup> F-FDG     | 446                 |
| 18      | RCa        | 54          | M      | 86          | 23.50      | <sup>18</sup> F-FDG     | 359                 |
| 19      | RCa        | 53          | F      | 55          | 18.33      | <sup>18</sup> F-FDG     | 289                 |
| Summary | 6PCa/13RCa | 61.42±10.63 | 12M/7F | 75.16±13.88 | 22.30±2.80 | 16FDG/3Cho              | 378.12±64.10        |

**Supplemental Table 1.** Patient demographics, disease diagnoses, PET radiotracers and injected doses.
